# Supplementary material
Source: ML conference proceedings conference paper supplement (https://openreview.net/forum?id=739jAzUXk7)
Supplement: supplementary_material [file attachment]

Reconstruction

ModelNet40

ScanObjectNN

Denoising

Registration

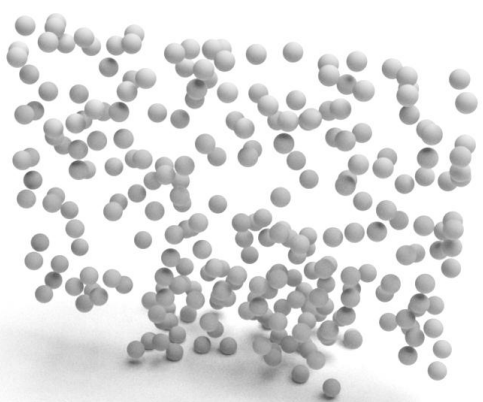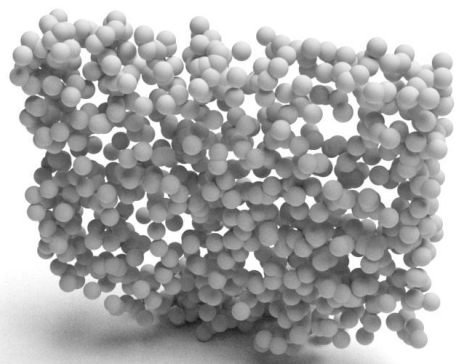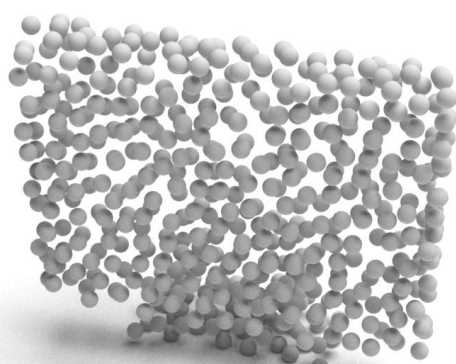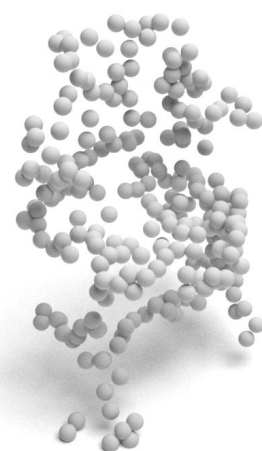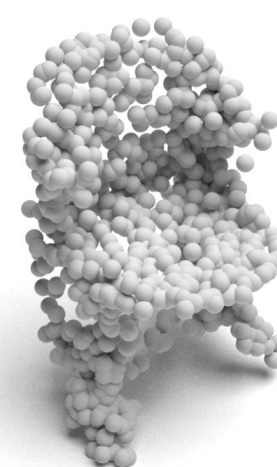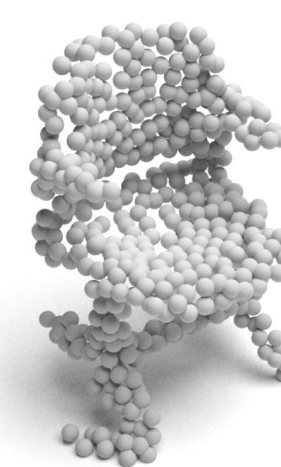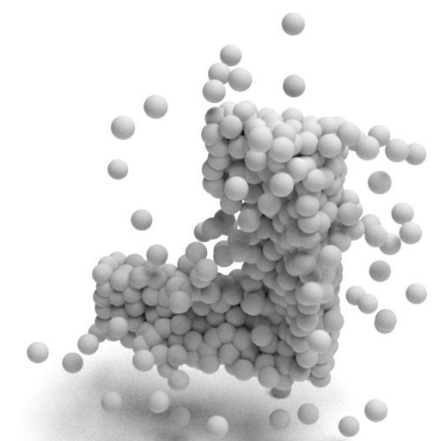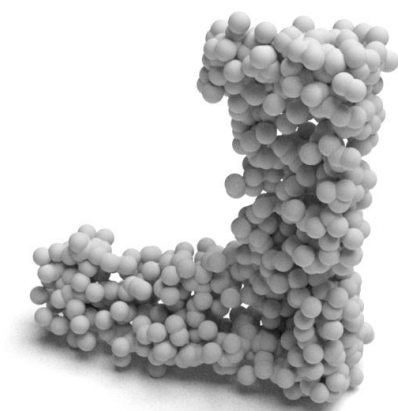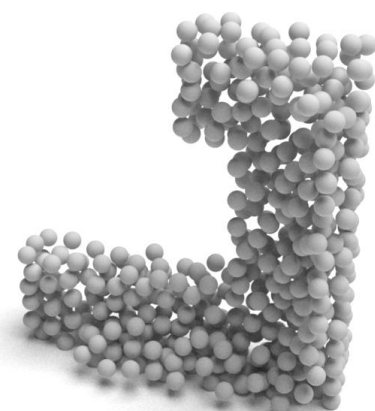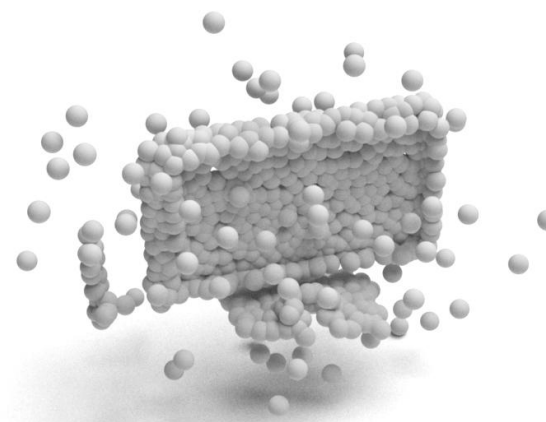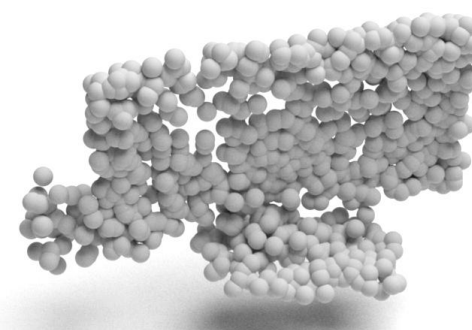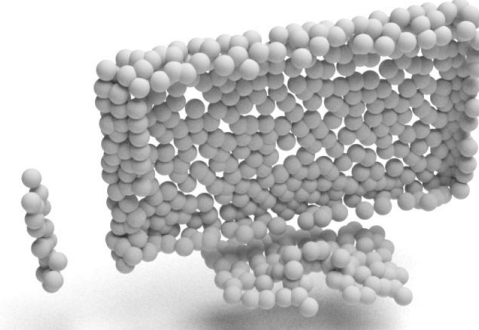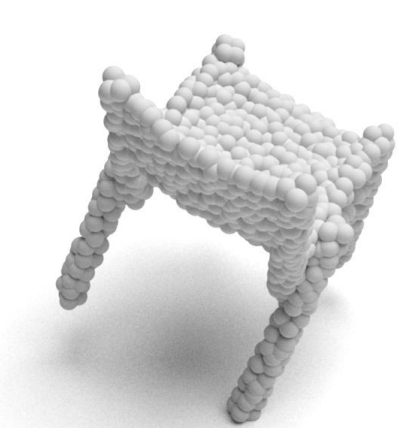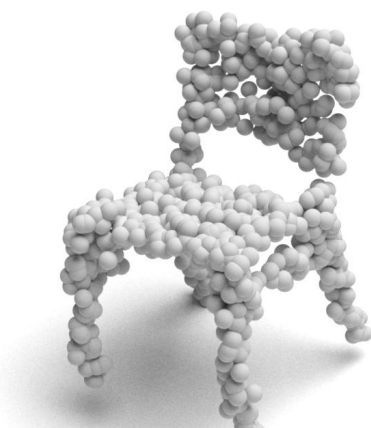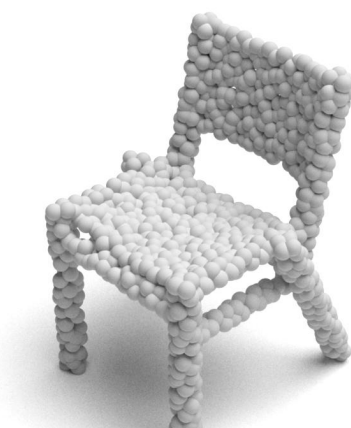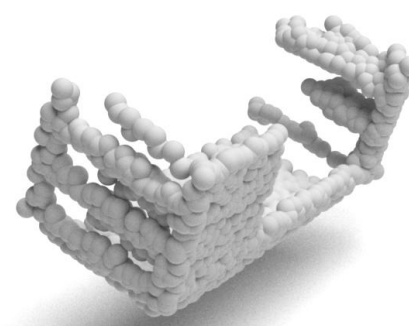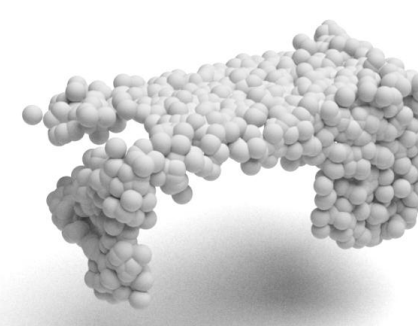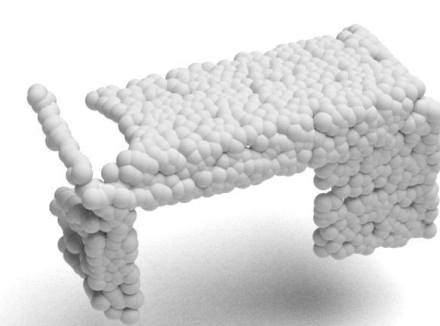

Input

Output

Ground Truth

Input

Output

Ground Truth
